# Supplementary material
Source: PubMed Central journal article supplement (PMC3956118)
Supplement: NIHMS550466-supplement-04.pdf [file NIHMS550466-supplement-04.pdf]

Table S4.

| Strain # | Genotype                                                                                                                                                                            | Source                   |
|----------|-------------------------------------------------------------------------------------------------------------------------------------------------------------------------------------|--------------------------|
| AH13     | <i>MAT a/α lys2/lys2 ho::LYS2/ho::LYS2 leu2/leu2 his3/his3 ura3/ura3 trp1/trp1</i>                                                                                                  | Hochwagen group          |
| SAy771   | <i>MAT a/α lys2/lys2 ho::LYS2/ho::LYS2 LEU2/leu2 ime4::HIS3/ime4::HIS3</i>                                                                                                          | Agarwala, Blitzblau 2012 |
| SAy821   | <i>MAT a/α lys2/lys2 ho::LYS2/ho::LYS2</i>                                                                                                                                          | Agarwala, Blitzblau 2012 |
| SAy834   | <i>MAT a/α lys2/lys2 ho::LYS2/ho::LYS2 ime1::HIS3MX6/ime1::HIS3mx6</i>                                                                                                              | Agarwala, Blitzblau 2012 |
| SAy841   | <i>MAT a/α lys2/lys2 ho::LYS2/ho::LYS2 ndt80::LEU2/ndt80::LEU2</i>                                                                                                                  | Agarwala, Blitzblau 2012 |
| SAy859   | <i>MAT a/α lys2/lys2 ho::LYS2/ho::LYS2 ime2::KanMX/ime2::KanMX</i>                                                                                                                  | Agarwala, Blitzblau 2012 |
| SAy914   | <i>MAT a/α lys2/lys2 ho::LYS2/ho::LYS2 3xmyc-IME4/3xmyc-IME4</i>                                                                                                                    | Agarwala, Blitzblau 2012 |
| SAy966   | <i>MAT a/α lys2/lys2 ho::LYS2/ho::LYS2 ndt80::LEU2/ndt80::LEU2 ime4::HIS3/ime4::HIS3</i>                                                                                            | This study               |
| SAy995   | <i>MAT a/α lys2/lys2 ho::LYS2/ho::LYS2 leu2::hisG/LEU2 his3::hisG/HIS3 trp1::hisG/TRP1 P<sub>GAL1</sub>-NDT80::TRP1/ndt80::LEU2, ura3::P<sub>GPD1</sub>-GAL4(848).ER::URA3/URA3</i> | Agarwala, Blitzblau 2012 |
| SAy1086  | <i>MAT a/α lys2/lys2 ho::LYS2/ho::LYS2 ime4-D349A,W351A/ime4-D349A,W351A</i>                                                                                                        | Agarwala, Blitzblau 2012 |
| SAy1235  | <i>MAT a/α lys2/lys2 ho::LYS2/ho::LYS2 LEU2/leu2 TRP1/trp1 3xHA-MUM2/3xHA-MUM2</i>                                                                                                  | Agarwala, Blitzblau 2012 |
| SAy1248  | <i>MAT a/α lys2/lys2 ho::LYS2/ho::LYS2 ime4::P<sub>CUP1</sub>-IME4::KanMX4/IME4 mum2::P<sub>CUP1</sub>-MUM2::KanMX4/MUM2 slz1::P<sub>CUP1</sub>-SLZ1::KanMX4/SLZ1</i>               | Agarwala, Blitzblau 2012 |
| SAy1254  | <i>MAT a/α lys2/lys2 ho::LYS2/ho::LYS2 LEU2/leu2 TRP1/trp1 3xHA-SLZ1/3xHA-SLZ1</i>                                                                                                  | Agarwala, Blitzblau 2012 |
| SAy1280  | <i>MAT a/α lys2/lys2 ho::LYS2/ho::LYS2 ndt80::LEU2/ndt80::LEU2 ime4-cat/ime4-cat</i>                                                                                                | This study               |
| SAy1310  | <i>MAT a/α lys2/lys2 ho::LYS2/ho::LYS2 ndt80::LEU2/ndt80::LEU2 mum2::HIS3/mum2::HIS3</i>                                                                                            | This study               |
| SAy1383  | <i>MAT a/α lys2/lys2 ho::LYS2/ho::LYS2 ime1::HIS3MX6/ime1::HIS3mx6 ime4::P<sub>CUP1</sub>-IME4::KanMX4/IME4</i>                                                                     | This study               |
| SAy1332  | <i>MAT a lys2 ho::LYS2 ime4::HIS3 HIS3 mrb1::KanMX</i>                                                                                                                              | This study               |
| SAy1333  | <i>MAT a lys2 ho::LYS2 ime4::HIS3 HIS3 leu2 mrb1::KanMX</i>                                                                                                                         | This study               |
| SAy1345  | <i>MAT a/α lys2/lys2 ho::LYS2/ho::LYS2 mrb36::KanMX/mrb36::KanMX</i>                                                                                                                | This study               |

|                            |                                                                                                                                                                                                                                              |            |
|----------------------------|----------------------------------------------------------------------------------------------------------------------------------------------------------------------------------------------------------------------------------------------|------------|
| <b>SAy1384</b>             | <i>MAT a/α lys2/lys2 ho::LYS2/ho::LYS2 ime1::HIS3MX6/ime1::HIS3mx6 mum2::P<sub>CUP1</sub>-MUM2::KanMX4/MUM2</i>                                                                                                                              | This study |
| <b>SAy1385</b>             | <i>MAT a/α lys2/lys2 ho::LYS2/ho::LYS2 ime1::HIS3MX6/ime1::HIS3mx6 slz1::P<sub>CUP1</sub>-SLZ1::KanMX4/SLZ1</i>                                                                                                                              | This study |
| <b>SAy1390<sup>1</sup></b> | <i>MAT a/α lys2/lys2 ho::LYS2/ho::LYS2 leu2::hisG/ leu2::hisG his3::hisG/ leu2::hisG trp1::hisG/trp1::hisG P<sub>GAL1</sub>-NDT80::TRP1/ndt80::LEU2, ura3::P<sub>GPD1</sub>-GAL4(848).ER::URA3/URA3 ime4::HIS3/IME4 yLR149c-mut/ yLR149c</i> | This study |
| <b>SAy1392<sup>1</sup></b> | <i>MAT a/α lys2/lys2 ho::LYS2/ho::LYS2 leu2::hisG/ leu2::hisG his3::hisG/ leu2::hisG trp1::hisG/trp1::hisG P<sub>GAL1</sub>-NDT80::TRP1/ndt80::LEU2, ura3::P<sub>GPD1</sub>-GAL4(848).ER::URA3/URA3 ime4::HIS3/IME4 YSP3-mut/YSP3</i>        | This study |
| <b>SAy1394<sup>1</sup></b> | <i>MAT a/α lys2/lys2 ho::LYS2/ho::LYS2 leu2::hisG/ leu2::hisG his3::hisG/ leu2::hisG trp1::hisG/trp1::hisG P<sub>GAL1</sub>-NDT80::TRP1/ndt80::LEU2, ura3::P<sub>GPD1</sub>-GAL4(848).ER::URA3/URA3 ime4::HIS3/IME4 MUS81-mut/MUS81</i>      | This study |
| <b>SAy1418<sup>1</sup></b> | <i>MAT a/α lys2/lys2 ho::LYS2/ho::LYS2 leu2::hisG/ leu2::hisG his3::hisG/ leu2::hisG trp1::hisG/trp1::hisG P<sub>GAL1</sub>-NDT80::TRP1/ndt80::LEU2, ura3::P<sub>GPD1</sub>-GAL4(848).ER::URA3/URA3 ime4::HIS3/IME4 yNL195c-mut/ yNL195c</i> | This study |
| <b>SAy1422</b>             | <i>S. mikatae MAT a/α HO+</i>                                                                                                                                                                                                                | This study |
| <b>SAy1424</b>             | <i>S. mikatae MAT a/α HO+ ndt80::hphMX/ndt80::hphMX</i>                                                                                                                                                                                      | This study |
| <b>SAy1425</b>             | <i>S. mikatae MAT a/α HO+ ndt80::hphMX/ndt80::hphMX ime4::NatMX/ime4::NatMX</i>                                                                                                                                                              | This study |
| <b>SAy1432</b>             | <i>MAT a/α lys2/lys2 ho::LYS2/ho::LYS2 leu2::hisG/ leu2::hisG his3::hisG/ leu2::hisG trp1::hisG/trp1::hisG ime1::KanMX/ime1::HisMX 2μm-URA3-pGPD</i>                                                                                         | This study |
| <b>SAy1433</b>             | <i>MAT a/α lys2/lys2 ho::LYS2/ho::LYS2 leu2::hisG/ leu2::hisG his3::hisG/ leu2::hisG trp1::hisG/trp1::hisG ime1::KanMX/ime1::HisMX 2μm-URA3-pGPD:SLZ1</i>                                                                                    | This study |
| <b>SAy1434</b>             | <i>MAT a/α lys2/lys2 ho::LYS2/ho::LYS2 leu2::hisG/ leu2::hisG his3::hisG/ leu2::hisG trp1::hisG/trp1::hisG ime1::KanMX/ime1::HisMX 2μm-URA3-pGPD:slz1-nlsΔ (Truncation of n-terminal 97 aa)</i>                                              | This study |
| <b>SAy1438</b>             | <i>MAT a/α lys2/lys2 ho::LYS2/ho::LYS2 leu2::hisG/ leu2::hisG his3::hisG/ leu2::hisG trp1::hisG/trp1::hisG ime1::KanMX/ime1::HisMX 2μm-URA3-pGPD:slz1-SV40 (n-terminal 97 aa replaced by SV40 NLS sequence)</i>                              | This study |
| <b>SAy1439</b>             | <i>MAT a/α lys2/lys2 ho::LYS2/ho::LYS2 leu2::hisG/ leu2::hisG his3::hisG/ leu2::hisG trp1::hisG/trp1::hisG ime1::KanMX/ime1::HisMX 2μm-URA3-pGPD:slz1-A1 (n-terminal 97 aa replaced by A1 NLS sequence)</i>                                  | This study |
| <b>SAy1441</b>             | <i>MAT a/α lys2/lys2 ho::LYS2/ho::LYS2 leu2::hisG/ leu2::hisG his3::hisG/ leu2::hisG trp1::hisG/trp1::hisG ime1::KanMX/ime1::HisMX 2μm-URA3-pGPD:slz1-Nop1<sup>nterm</sup> (n-terminal 97 aa replaced by n-terminal 82aa of Nop1)</i>        | This study |
| <b>SAy 1469</b>            | <i>MAT a/α lys2/lys2 ho::LYS2/ho::LYS2 leu2::hisG/ leu2::hisG his3::hisG/ leu2::hisG trp1::hisG/trp1::hisG P<sub>GAL1</sub>-NDT80::TRP1/ndt80::KANMX 3xHA-MUM2/MUM2 3xMYC-IME4/IME4</i>                                                      | This study |

|                             |                                                                                                            |            |
|-----------------------------|------------------------------------------------------------------------------------------------------------|------------|
| <b>SAy1479</b> <sup>1</sup> | <i>MAT a/α lys2/lys2 ho::LYS2/ho::LYS2 leu2/leu2 his3/his3 ura3/ura3 trp1/trp1 ysp3-mut/ysp3-mut</i>       | This study |
| <b>SAy1480</b> <sup>1</sup> | <i>MAT a/α lys2/lys2 ho::LYS2/ho::LYS2 leu2/leu2 his3/his3 ura3/ura3 trp1/trp1 ysp3-mut/ysp3-mut</i>       | This study |
| <b>SAy1481</b> <sup>1</sup> | <i>MAT a/α lys2/lys2 ho::LYS2/ho::LYS2 leu2/leu2 his3/his3 ura3/ura3 trp1/trp1 ylr149c-mut/ylr149c-mut</i> | This study |
| <b>SAy1482</b> <sup>1</sup> | <i>MAT a/α lys2/lys2 ho::LYS2/ho::LYS2 leu2/leu2 his3/his3 ura3/ura3 trp1/trp1 ynl195c-mut/ynl195c-mut</i> | This study |
| <b>SAy1491</b> <sup>1</sup> | <i>MAT a/α lys2/lys2 ho::LYS2/ho::LYS2 leu2/leu2 his3/his3 ura3/ura3 trp1/trp1 mei5-mut/ mei5-mut</i>      | This study |
| <b>SAy1492</b> <sup>1</sup> | <i>MAT a/α lys2/lys2 ho::LYS2/ho::LYS2 leu2/leu2 his3/his3 ura3/ura3 trp1/trp1</i>                         | This study |
| <b>SAy1493</b> <sup>1</sup> | <i>MAT a/α lys2/lys2 ho::LYS2/ho::LYS2 leu2/leu2 his3/his3 ura3/ura3 trp1/trp1 zip1-mut/zip1-mut</i>       | This study |
| <b>SAy1494</b> <sup>1</sup> | <i>MAT a/α lys2/lys2 ho::LYS2/ho::LYS2 leu2/leu2 his3/his3 ura3/ura3 trp1/trp1 nam8-mut/nam8-mut</i>       | This study |

<sup>1</sup>The “-mut” allele designation refers to the allele that has been mutated at the m<sup>6</sup>A site.
